# Supplementary material for: The development of an approach for the precision determination of thermal strain tensor elements for single crystals using the example of t-Ag0.8Li0.2InSe2
Source: Royal Society of Chemistry journal article supplement (doi:10.1039/d3ce01186k), 2024-01-01

## Supplementary information

### **The development of approach to the precision determination of the thermal strain tensor elements for single crystals on the example of *t*-Ag<sub>0.8</sub>Li<sub>0.2</sub>InSe<sub>2</sub>**

Polina S. Serebrennikova<sup>\*a,b</sup>, Sergey I. Lobanov<sup>a,c</sup>, Alexander S. Sukhikh<sup>a,b</sup>, Lyudmila I. Isaenko<sup>a,c</sup> and Sergey A. Gromilov<sup>a,b</sup>

<sup>a</sup>Novosibirsk State University, Pirogova Street, 2, Novosibirsk, 630090, Russian Federation.

<sup>b</sup>Nikolaev Institute of Inorganic Chemistry of the Siberian Branch of the Russian Academy of Science, Lavrentyev Avenue, 3, Novosibirsk, 630090, Russian Federation.

<sup>c</sup>Sobolev Institute of Geology and Mineralogy of the Siberian Branch of the Russian Academy of Science, ac. Koptyug Avenue, 3, 630090, Russian Federation.

\*Corresponding author [serebrennikova@niic.nsc.ru](mailto:serebrennikova@niic.nsc.ru)

Table S1  $t$ - $\text{Ag}_{0.8}\text{Li}_{0.2}\text{InSe}_2$  sample 1 crystallographic parameters and the results of structure refinement

| Crystal data                                                               |                                                                                                                                                                                                                                                               |                                                                                                                                                                                                                                                               |
|----------------------------------------------------------------------------|---------------------------------------------------------------------------------------------------------------------------------------------------------------------------------------------------------------------------------------------------------------|---------------------------------------------------------------------------------------------------------------------------------------------------------------------------------------------------------------------------------------------------------------|
| Chemical formula                                                           | $\text{Ag}_{0.795}\text{InLi}_{0.205}\text{Se}_2$                                                                                                                                                                                                             | $\text{Ag}_{0.796}\text{InLi}_{0.204}\text{Se}_2$                                                                                                                                                                                                             |
| $M_r$                                                                      | 359.92                                                                                                                                                                                                                                                        | 359.92                                                                                                                                                                                                                                                        |
| Crystal system, space group                                                | Tetragonal, $I-42d$                                                                                                                                                                                                                                           | Tetragonal, $I-42d$                                                                                                                                                                                                                                           |
| Temperature (K)                                                            | 150                                                                                                                                                                                                                                                           | 300                                                                                                                                                                                                                                                           |
| $a, c$ (Å)                                                                 | 6.0640 (3), 11.6831 (7)                                                                                                                                                                                                                                       | 6.07290 (14), 11.6732 (4)                                                                                                                                                                                                                                     |
| $V$ (Å <sup>3</sup> )                                                      | 429.61 (5)                                                                                                                                                                                                                                                    | 430.51 (2)                                                                                                                                                                                                                                                    |
| $Z$                                                                        | 4                                                                                                                                                                                                                                                             | 4                                                                                                                                                                                                                                                             |
| Radiation type                                                             | Mo $K\alpha$                                                                                                                                                                                                                                                  | Mo $K\alpha$                                                                                                                                                                                                                                                  |
| $\mu$ (mm <sup>-1</sup> )                                                  | 25.73                                                                                                                                                                                                                                                         | 25.68                                                                                                                                                                                                                                                         |
| Crystal size (mm)                                                          | 0.12 × 0.12 × 0.06                                                                                                                                                                                                                                            |                                                                                                                                                                                                                                                               |
| Data collection                                                            |                                                                                                                                                                                                                                                               |                                                                                                                                                                                                                                                               |
| Diffractometer                                                             | Bruker D8 VENTURE                                                                                                                                                                                                                                             | Bruker D8 VENTURE                                                                                                                                                                                                                                             |
| Absorption correction                                                      | Multi-scan <i>SADABS2016/2</i> (Bruker,2016/2) was used for absorption correction. $wR2(\text{int})$ was 0.1144 before and 0.0368 after correction. The Ratio of minimum to maximum transmission is 0.6163. The $\lambda/2$ correction factor is Not present. | Multi-scan <i>SADABS2016/2</i> (Bruker,2016/2) was used for absorption correction. $wR2(\text{int})$ was 0.0891 before and 0.0425 after correction. The Ratio of minimum to maximum transmission is 0.6306. The $\lambda/2$ correction factor is Not present. |
| $T_{\text{min}}, T_{\text{max}}$                                           | 0.460, 0.747                                                                                                                                                                                                                                                  | 0.471, 0.747                                                                                                                                                                                                                                                  |
| No. of measured, independent and observed [ $I > 2\sigma(I)$ ] reflections | 1250, 413, 337                                                                                                                                                                                                                                                | 1890, 517, 411                                                                                                                                                                                                                                                |
| $R_{\text{int}}$                                                           | 0.019                                                                                                                                                                                                                                                         | 0.023                                                                                                                                                                                                                                                         |
| $(\sin \theta/\lambda)_{\text{max}}$ (Å <sup>-1</sup> )                    | 0.768                                                                                                                                                                                                                                                         | 0.834                                                                                                                                                                                                                                                         |
| Refinement                                                                 |                                                                                                                                                                                                                                                               |                                                                                                                                                                                                                                                               |
| $R[F^2 > 2\sigma(F^2)], wR(F^2), S$                                        | 0.019, 0.045, 1.08                                                                                                                                                                                                                                            | 0.020, 0.054, 1.10                                                                                                                                                                                                                                            |
| No. of reflections                                                         | 413                                                                                                                                                                                                                                                           | 517                                                                                                                                                                                                                                                           |
| No. of parameters                                                          | 12                                                                                                                                                                                                                                                            | 12                                                                                                                                                                                                                                                            |
| $\Delta\rho_{\text{max}}, \Delta\rho_{\text{min}}$ (e Å <sup>-3</sup> )    | 0.72, -0.89                                                                                                                                                                                                                                                   | 0.71, -0.59                                                                                                                                                                                                                                                   |
| Absolute structure                                                         | Flack $x$ determined using 132 quotients $[(I+)-(I-)]/[(I+)+(I-)]$ (Parsons, Flack and Wagner, Acta Cryst. B69 (2013) 249-259).                                                                                                                               | Flack $x$ determined using 164 quotients $[(I+)-(I-)]/[(I+)+(I-)]$ (Parsons, Flack and Wagner, Acta Cryst. B69 (2013) 249-259).                                                                                                                               |
| Absolute structure parameter                                               | -0.03 (2)                                                                                                                                                                                                                                                     | 0.002 (19)                                                                                                                                                                                                                                                    |

Table S2  $t$ - $\text{Ag}_{0.8}\text{Li}_{0.2}\text{InSe}_2$  sample 2 and 3 crystallographic parameters and the results of structure refinement

| Crystal data                                                               |                                                                                                                                                                                                                                                         |                                                                                                                                                                                                                                                        |
|----------------------------------------------------------------------------|---------------------------------------------------------------------------------------------------------------------------------------------------------------------------------------------------------------------------------------------------------|--------------------------------------------------------------------------------------------------------------------------------------------------------------------------------------------------------------------------------------------------------|
| Sample number                                                              | Sample 2                                                                                                                                                                                                                                                | Sample 3                                                                                                                                                                                                                                               |
| Chemical formula                                                           | $\text{Ag}_{0.793}\text{InLi}_{0.207}\text{Se}_2$                                                                                                                                                                                                       | $\text{Ag}_{0.790}\text{InLi}_{0.210}\text{Se}_2$                                                                                                                                                                                                      |
| $M_r$                                                                      | 359.67                                                                                                                                                                                                                                                  | 359.41                                                                                                                                                                                                                                                 |
| Crystal system, space group                                                | Tetragonal, $I-42d$                                                                                                                                                                                                                                     | Tetragonal, $I-42d$                                                                                                                                                                                                                                    |
| Temperature (K)                                                            | 150                                                                                                                                                                                                                                                     | 300                                                                                                                                                                                                                                                    |
| $a, c$ (Å)                                                                 | 6.0658 (3), 11.6925 (7)                                                                                                                                                                                                                                 | 6.07490 (14), 11.6869 (5)                                                                                                                                                                                                                              |
| $V$ (Å <sup>3</sup> )                                                      | 430.21 (5)                                                                                                                                                                                                                                              | 431.30 (3)                                                                                                                                                                                                                                             |
| $Z$                                                                        | 4                                                                                                                                                                                                                                                       | 4                                                                                                                                                                                                                                                      |
| Radiation type                                                             | Mo $K\alpha$                                                                                                                                                                                                                                            | Mo $K\alpha$                                                                                                                                                                                                                                           |
| $\mu$ (mm <sup>-1</sup> )                                                  | 25.68                                                                                                                                                                                                                                                   | 25.61                                                                                                                                                                                                                                                  |
| Crystal size (mm)                                                          | 0.15 × 0.15 × 0.06                                                                                                                                                                                                                                      | 0.25 × 0.25 × 0.2                                                                                                                                                                                                                                      |
| Data collection                                                            |                                                                                                                                                                                                                                                         |                                                                                                                                                                                                                                                        |
| Diffractometer                                                             | Bruker D8 VENTURE                                                                                                                                                                                                                                       | Bruker D8 VENTURE                                                                                                                                                                                                                                      |
| Absorption correction                                                      | Multi-scan SADABS2016/2 (Bruker, 2016/2) was used for absorption correction. $wR2(\text{int})$ was 0.0817 before and 0.0338 after correction. The Ratio of minimum to maximum transmission is 0.5634. The $\lambda/2$ correction factor is Not present. | Numerical SADABS2016/2 (Bruker, 2016/2) was used for absorption correction. $wR2(\text{int})$ was 0.1553 before and 0.0704 after correction. The Ratio of minimum to maximum transmission is 0.1109. The $\lambda/2$ correction factor is Not present. |
| $T_{\min}, T_{\max}$                                                       | 0.421, 0.747                                                                                                                                                                                                                                            | 0.017, 0.149                                                                                                                                                                                                                                           |
| No. of measured, independent and observed [ $I > 2\sigma(I)$ ] reflections | 987, 410, 338                                                                                                                                                                                                                                           | 3452, 520, 395                                                                                                                                                                                                                                         |
| $R_{\text{int}}$                                                           | 0.013                                                                                                                                                                                                                                                   | 0.052                                                                                                                                                                                                                                                  |
| $(\sin \theta/\lambda)_{\text{max}}$ (Å <sup>-1</sup> )                    | 0.771                                                                                                                                                                                                                                                   | 0.833                                                                                                                                                                                                                                                  |
| Refinement                                                                 |                                                                                                                                                                                                                                                         |                                                                                                                                                                                                                                                        |
| $R[F^2 > 2\sigma(F^2)], wR(F^2), S$                                        | 0.016, 0.047, 1.14                                                                                                                                                                                                                                      | 0.040, 0.120, 1.05                                                                                                                                                                                                                                     |
| No. of reflections                                                         | 410                                                                                                                                                                                                                                                     | 520                                                                                                                                                                                                                                                    |
| No. of parameters                                                          | 12                                                                                                                                                                                                                                                      | 12                                                                                                                                                                                                                                                     |
| $\Delta\rho_{\text{max}}, \Delta\rho_{\text{min}}$ (e Å <sup>-3</sup> )    | 0.75, -0.46                                                                                                                                                                                                                                             | 1.01, -1.42                                                                                                                                                                                                                                            |
| Absolute structure                                                         | Flack $x$ determined using 132 quotients $[(I+)-(I-)]/[(I+)+(I-)]$ (Parsons, Flack and Wagner, Acta Cryst. B69 (2013) 249-259).                                                                                                                         | Classical Flack method preferred over Parsons because s.u. lower.                                                                                                                                                                                      |
| Absolute structure parameter                                               | 0.00 (2)                                                                                                                                                                                                                                                | -0.07 (6)                                                                                                                                                                                                                                              |

Fig. S1  $t\text{-Ag}_{0.8}\text{Li}_{0.2}\text{InSe}_2$  crystal structure parameters changes in the 90-500 K range according to the SC-XRD data: the equivalent parameter of the atomic displacement for the main atoms (a); the volumes of the coordination tetrahedra  $\text{AgSe}_4$  and  $\text{InSe}_4$  (b); the angles in the structure according to Fig. 7 (c, d).

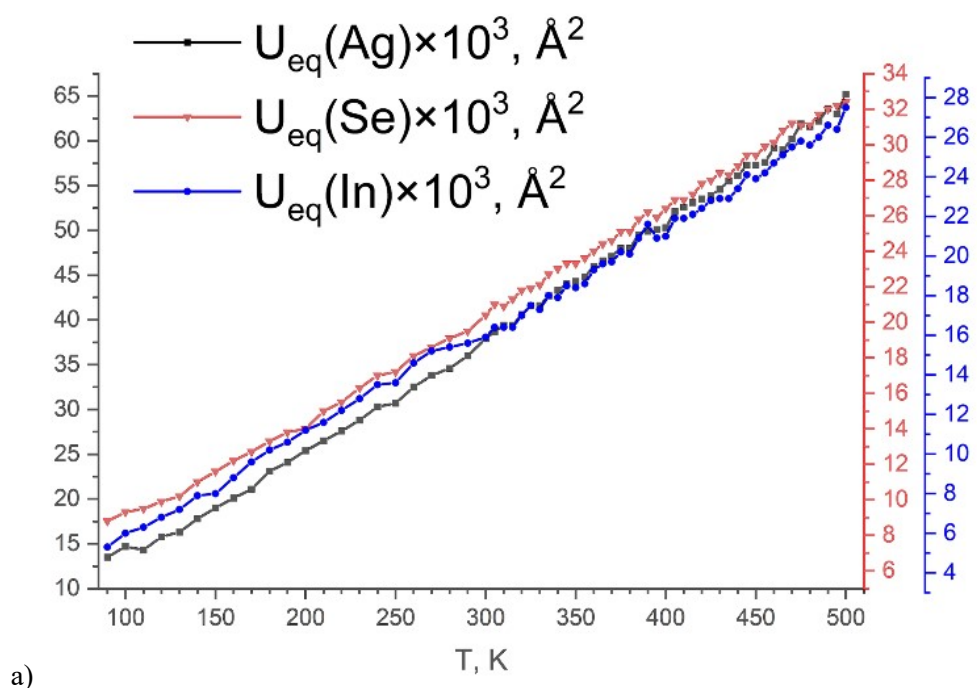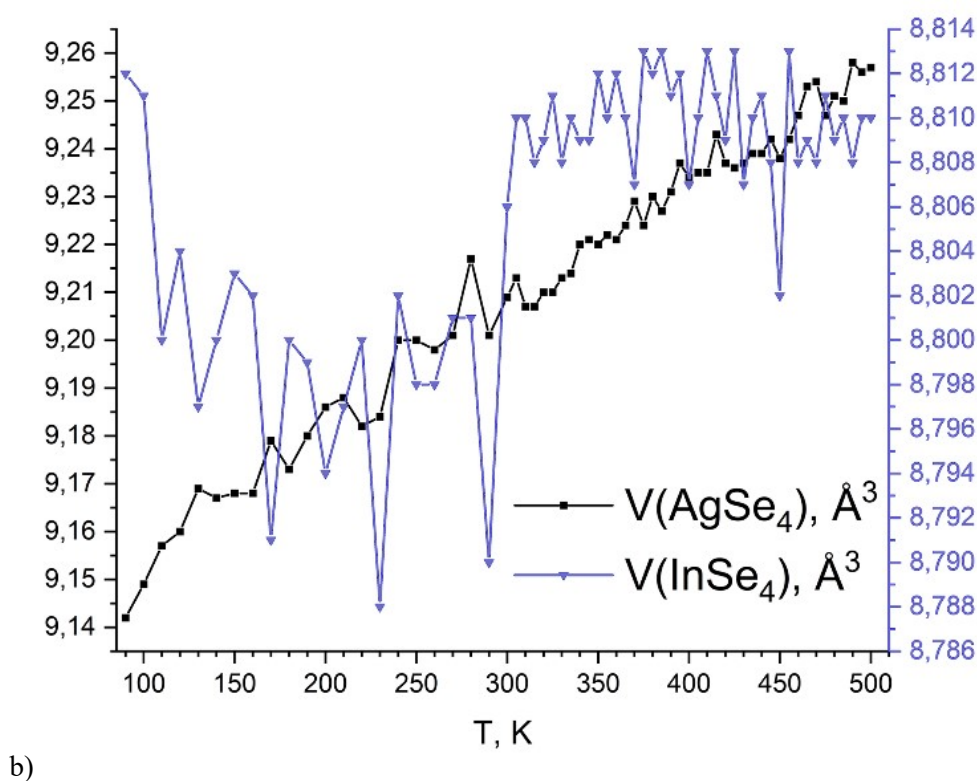

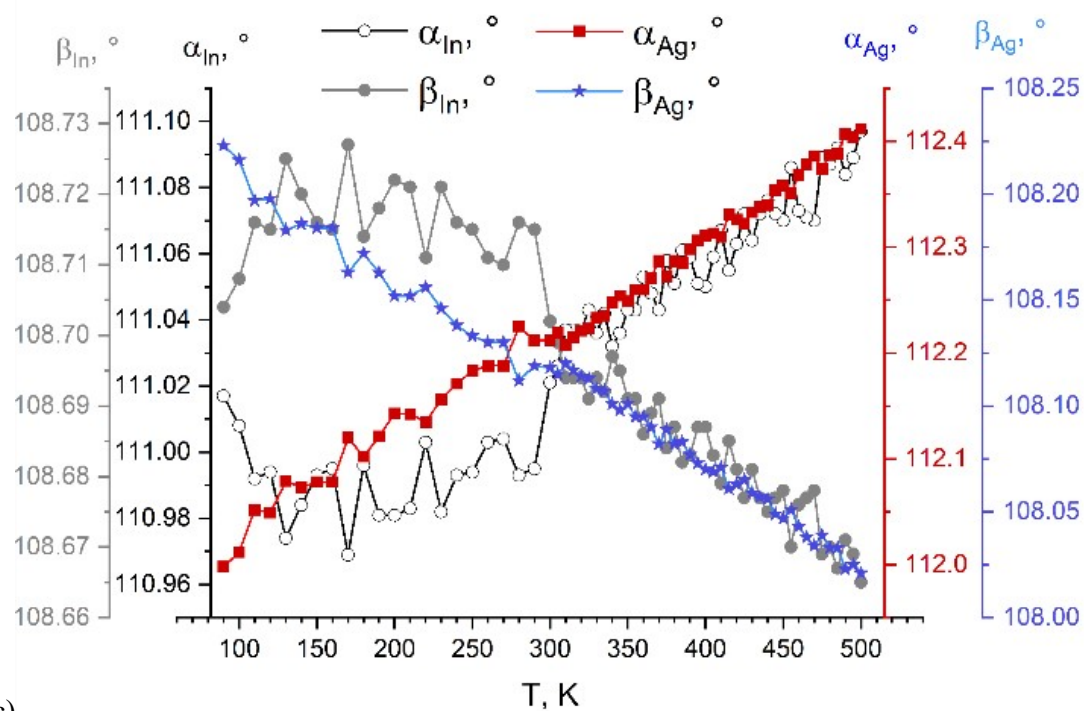

c)

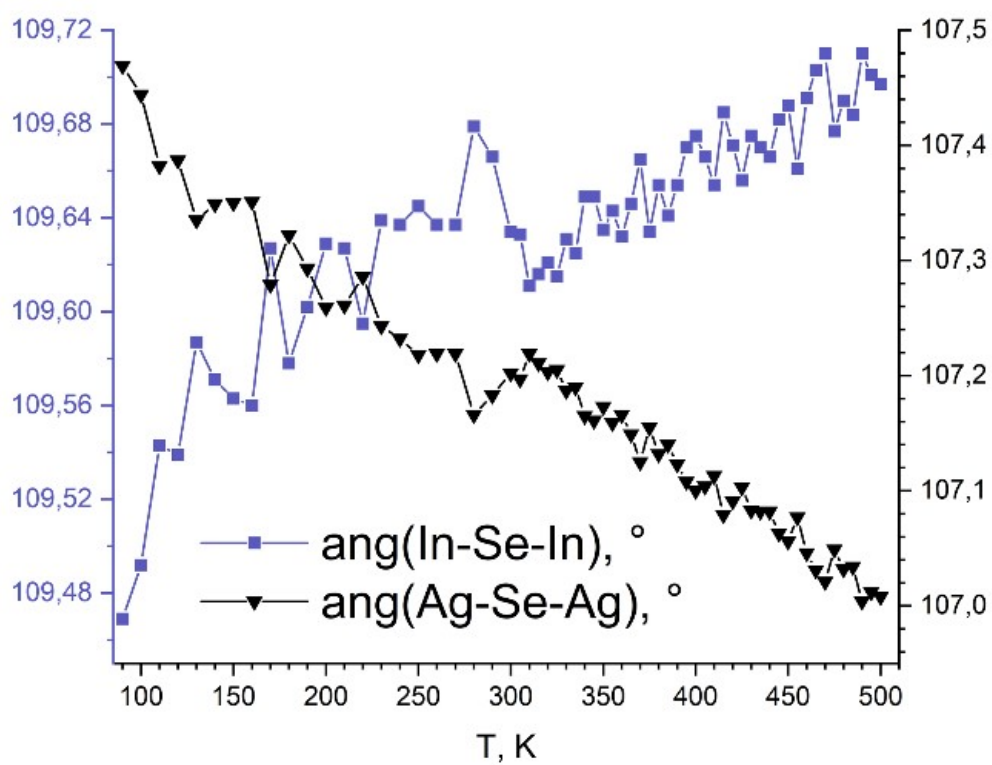

d)

Table S3 The results of reflexes processing when refining the UCP by doublet reflexes of the external Si standard (T = 300 K)

| $hkl$                                                                                       | $2\theta_{\text{calc}}, ^\circ$ | X, pix. | Y, pix. | $2\theta_{\text{exp}}, ^\circ$ | $a, c, \text{\AA}$     |
|---------------------------------------------------------------------------------------------|---------------------------------|---------|---------|--------------------------------|------------------------|
| Crystal 1. $D=109.07, 2\theta_D = -85^\circ$                                                |                                 |         |         |                                |                        |
| $K\alpha_1(1-59)_{\text{Si}}$                                                               | 84.987                          | 387.66  | 505.29  |                                |                        |
| $K\alpha_1(1060)_1$                                                                         | 86.009 <sup>A</sup>             | 397.87  | 505.33  | 85.705                         | 6.0813(6) <sup>B</sup> |
| $K\alpha_2(1-59)_{\text{Si}}$                                                               | 85.623                          | 396.70  | 504.88  |                                |                        |
| Crystal 1. $D=109.07, 2\theta_D = -85^\circ$                                                |                                 |         |         |                                |                        |
| $K\alpha_1(1111)_{\text{Si}}$                                                               | 92.813                          | 382.52  | 502.86  |                                |                        |
| $K\alpha_1(0024)_1$                                                                         | 93.531 <sup>A</sup>             | 392.53  | 506.56  | 93.523                         | 11.684(1)              |
| $K\alpha_1(1111)_{\text{Si}}$                                                               | 93.543                          | 392.81  | 503.12  |                                |                        |
| Crystal 2. $D=109.07, 2\theta_D = -85^\circ$                                                |                                 |         |         |                                |                        |
| $K\alpha_1(1-59)_{\text{Si}}$                                                               | 84.987                          | 385.04  | 505.55  |                                |                        |
| $K\alpha_1(1060)_2$                                                                         | 85.977 <sup>A</sup>             | 395.27  | 504.87  | 85.714                         | 6.0808(6)              |
| $K\alpha_2(1-59)_{\text{Si}}$                                                               | 85.623                          | 393.99  | 505.75  |                                |                        |
| Crystal 2. $D=109.07, 2\theta_D = -85^\circ$                                                |                                 |         |         |                                |                        |
| $K\alpha_1(1111)_{\text{Si}}$                                                               | 92.813                          | 382.52  | 502.86  |                                |                        |
| $K\alpha_1(0024)_2$                                                                         | 93.433 <sup>A</sup>             | 392.54  | 506.78  | 93.524                         | 11.684(1)              |
| $K\alpha_1(1111)_{\text{Si}}$                                                               | 93.543                          | 392.81  | 503.12  |                                |                        |
| Crystal $\text{Ag}_{0.63}\text{Li}_{0.37}\text{InSe}_2$ . $D=109.07, 2\theta_D = -85^\circ$ |                                 |         |         |                                |                        |
| $K\alpha_1(1-59)_{\text{Si}}$                                                               | 84.987                          | 387.28  | 505.94  |                                |                        |
| $K\alpha_1(6-100)$                                                                          | 86.157 <sup>A</sup>             | 403.67  | 506.89  | 86.132                         | 6.0570(6)              |
| $K\alpha_1(08-16)$                                                                          | 85.002 <sup>A</sup>             | 388.03  | 507.90  | 85.039                         | 11.648(1)              |
| $K\alpha_2(1-59)_{\text{Si}}$                                                               | 85.623                          | 396.38  | 506.08  |                                |                        |

A – calculated by the results of single crystal XRD

B – absolute errors were calculated for  $\Delta\theta=0.005^\circ$

**Fig. S2** The dependence of the relative error in determining UCP by the "Doublet" method on the vertically displacement of studied diffraction peak, based on the experiment with Si. The level of relative error in UCP determination calculated from the goniometer positioning error is shown by a red dotted line.

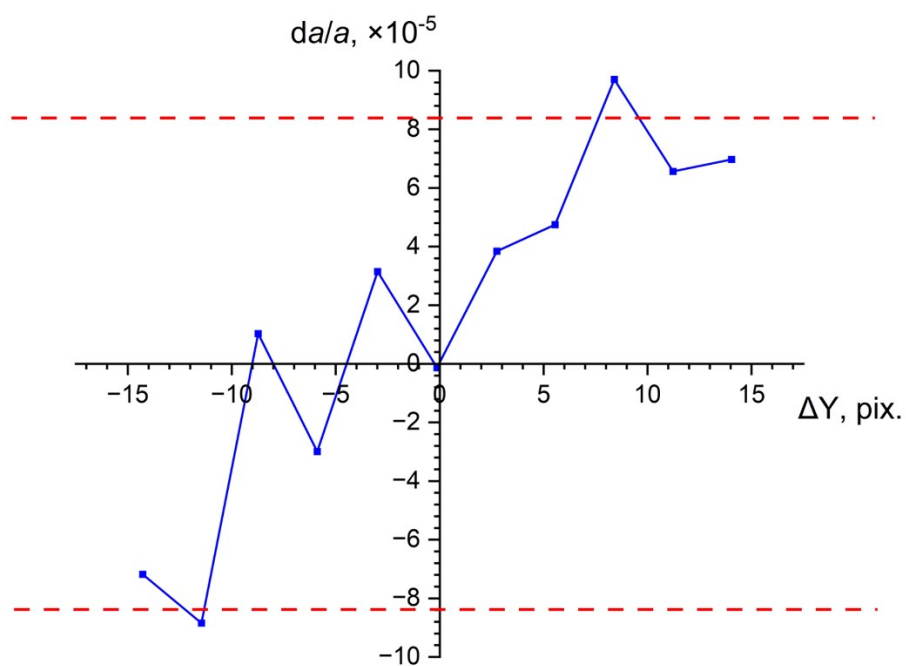

Supplement: d3ce01186k1.pdf [file d3ce01186k1.pdf]
